# Supplementary material
Source: ML conference proceedings conference paper supplement (https://proceedings.neurips.cc/paper_files/paper/2016/hash/2dffbc474aa176b6dc957938c15d0c8b-Abstract.html)
Supplement: Supplementary file [file 2dffbc474aa176b6dc957938c15d0c8b-Supplemental.zip]

## A Appendix: Proofs

### A.1 Proof of Theorem 1

Proof technique is based on [Kotłowski and Dembczyński, 2015], where they derive a similar bound in the binary classification setting. We first relate the  $\Psi$ -regret to weighted 0-1 loss regret. Define the  $\alpha$ -weighted 0-1 loss  $\ell_\alpha : \mathbb{R} \times \mathbb{R} \rightarrow [0, 1]$  as:

$$\ell_\alpha(\hat{y}, y) = \alpha \mathbb{I}[y = 0] \mathbb{I}[\hat{y} = 1] + (1 - \alpha) \mathbb{I}[y = 1] \mathbb{I}[\hat{y} = 0],$$

Let  $\hat{Y} = f(X)$  for some function  $f$ . The  $\ell_\alpha$ -risk of  $f$  with respect to the underlying distribution over  $X, Y$  and  $\Omega$  is defined as:

$$\text{Risk}_\alpha(\hat{Y}, Y) = \mathbb{E}[\ell_\alpha(\hat{Y}_{ij}, Y_{ij})] = \alpha \text{FP}(\hat{Y}, Y) + (1 - \alpha) \text{FN}(\hat{Y}, Y).$$

Define the Bayes optimal corresponding to the above risk:  $f_\alpha^*(X) = \arg \min_f \text{Risk}_\alpha(f(X), Y)$ . Let  $\text{Risk}_\alpha^* := \text{Risk}(f_\alpha^*(X))$ . The  $\ell_\alpha$ -regret of  $f$  is defined as:

$$\text{Reg}_\alpha(f(X)) := \text{Risk}_\alpha(f(X)) - \text{Risk}_\alpha^*.$$

**Lemma 2.** *Let  $\Psi$  be a linear-fractional performance metric as defined in (3), (4) or (5). Then for  $\alpha \in (0, 1)$  defined as:*

$$\alpha = \frac{\Psi^* c_2 - c_1}{\Psi^* c_2 - c_1 + \Psi^* d_2 - d_1}, \quad (9)$$

where  $c_1, d_1, c_2, d_2$  are constants that depend on  $\Psi$ , there exists some constant  $C > 0$  such that, for any  $f$ :

$$\Psi^* - \Psi(f(X), Y) \leq C(\text{Risk}_\alpha(f(X), Y) - \text{Risk}_\alpha^*). \quad (10)$$

Let  $\ell : \{0, 1\} \times \mathbb{R} \rightarrow \mathbb{R}_+$  be a  $\lambda'$ -strongly proper composite loss [Agarwal, 2014], such as the squared loss or the logistic. Given real-valued predictions  $Z \in \mathbb{R}^{n \times L}$ , we now argue that there exists a thresholding  $\text{Thr}_{\theta^*}(Z) \in \{0, 1\}^{n \times L}$  such that  $\text{Risk}_\alpha(\text{Thr}_{\theta^*}(Z), Y)$  is bounded by the  $\ell$ -regret of a strongly proper loss  $\ell$  (where  $\text{Thr}$  operator is defined as in Step 2 of Algorithm 1).

**Lemma 3.** *Let  $\ell$  be a  $\lambda$ -strongly proper loss function, and  $\alpha$  be defined as in (9). Then, there exists  $\theta^*$  s.t.*

$$\text{Reg}_\alpha(\text{Thr}_{\theta^*}(Z)) \leq \sqrt{\frac{2}{\lambda}} \sqrt{\text{Reg}_\ell(Z)}.$$

Finally, we show that estimating  $\hat{\theta}$  from training samples (Step 3 of Algorithm 1) is sufficient for bounding the  $\Psi$ -regret.

**Lemma 4.** *We have:*

$$\max_{\theta} \hat{\Psi}(\text{Thr}_{\theta}(Z), Y) \geq \hat{\Psi}(\text{Thr}_{\theta^*}(Z), Y),$$

and

$$\max_{\theta} \hat{\Psi}(\text{Thr}_{\theta}(Z_{\Omega}), Y_{\Omega}) \geq \max_{\theta} \Psi(\text{Thr}_{\theta}(Z), Y) - O\left(\frac{1}{\sqrt{|\Omega|}}\right).$$

The proof of the Theorem is complete by chaining the above three Lemmas.  $\square$

**Remark 7.** *When  $\Psi^*$  is known (in the noise-free or realizable setting,  $\Psi^*$  is the maximum possible value of  $\Psi$ ), we can get a closed form for  $\theta^*$ , which is  $\theta^* = \xi(\alpha)$  where  $\xi$  is the link function corresponding to the proper loss  $\ell$ .*

#### A.1.1 Proof of Lemma 2

Let  $\hat{Y} = f(X)$ . Consider the metric  $\Psi$  from family (3) for the moment. Define  $A(\hat{Y}) = a_0 + a_{11} \text{TP} + a_{01} \text{FP} + a_{10} \text{FN} + a_{00} \text{TN} := c_1 \text{FP} + d_1 \text{FN} + e_1$  and  $B(\hat{Y}) = b_0 + b_{11} \text{TP} + b_{01} \text{FP} + b_{10} \text{FN} + b_{00} \text{TN} :=$

$c_2\text{FP}+d_2\text{FN}+e_2$  (for constants  $c_1, c_2, d_1, d_2, e_1, e_2$  suitably defined), so that  $\Psi(\hat{Y}, Y) = A(\hat{Y})/B(\hat{Y})$ . Let  $f^*$  denote the Bayes optimal attaining  $\Psi^* = A^*/B^*$ . We have:

$$\begin{aligned}
\Psi^* - \Psi(\hat{Y}, Y) &= \frac{\Psi^* B(\hat{Y}) - A(\hat{Y})}{B(\hat{Y})} \\
&= \frac{\Psi^* B(\hat{Y}) - A(\hat{Y}) - (\Psi^* B^* - A^*)}{B(\hat{Y})} \\
&= \frac{\Psi^*(B(\hat{Y}) - B^*) - (A(\hat{Y}) - A^*)}{B(\hat{Y})} \\
&= \frac{(\Psi^* c_2 - c_1)(\text{FP}(\hat{Y}, Y) - \text{FP}(f^*(X), Y)) + (\Psi^* d_2 - d_1)(\text{FN}(\hat{Y}, Y) - \text{FN}(f^*(X), Y))}{B(\hat{Y})} \\
&\leq \frac{(\Psi^* c_2 - c_1)(\text{FP}(\hat{Y}, Y) - \text{FP}(f^*(X), Y)) + (\Psi^* d_2 - d_1)(\text{FN}(\hat{Y}, Y) - \text{FN}(f^*(X), Y))}{\gamma'} \\
&= C(\text{Risk}_\alpha(\hat{Y}, Y) - \text{Risk}_\alpha(f^*(X), Y)).
\end{aligned}$$

Assuming  $(\Psi^* c_2 - c_1) \geq 0$  and  $(\Psi^* d_2 - d_1) \geq 0$ , the last equality follows by defining:

$$\alpha = \frac{\Psi^* c_2 - c_1}{\Psi^* c_2 - c_1 + \Psi^* d_2 - d_1}. \quad (11)$$

and  $C = \frac{\Psi^* c_2 - c_1 + \Psi^* d_2 - d_1}{\gamma'}$ . The statement of the lemma follows. When  $\Psi$  is a metric from family (4), we can apply Proposition 1 of [Koyejo et al., 2015] to see that  $\text{TP}_i = \text{TP}$ ,  $\text{FP}_i = \text{FP}$  and so on (as the expectations are defined wrt  $\text{TP}_{ij}, \text{FP}_{ij}$ ), which yields  $\Psi^*$  is identical as in the micro-averaging case. So, the same regret bound applies as shown below: Define  $A_i = a_0 + a_{11}\text{TP}_i + a_{01}\text{FP}_i + a_{10}\text{FN}_i + a_{00}\text{TN}_i = c_1\text{FP}_i + d_1\text{FN}_i + e_1$  and  $B_i$  similarly. As before, let  $\Psi^* = A^*/B^*$ . So when  $\Psi$  is of the form (4),

$$\begin{aligned}
\Psi^* - \Psi(\hat{Y}, Y) &= \frac{1}{n} \sum_{i=1}^n \frac{\Psi^* B_i(\hat{Y}) - A_i(\hat{Y})}{B_i(\hat{Y})} \\
&= \frac{1}{n} \sum_{i=1}^n \frac{\Psi^* B_i(\hat{Y}) - A_i(\hat{Y}) - (\Psi^* B^* - A^*)}{B_i(\hat{Y})} \\
&= \frac{1}{n} \sum_{i=1}^n \frac{\Psi^*(B_i(\hat{Y}) - B^*) - (A_i(\hat{Y}) - A^*)}{B_i(\hat{Y})} \\
&= \frac{1}{n} \sum_{i=1}^n \frac{(\Psi^* c_2 - c_1)(\text{FP}_i(\hat{Y}, Y) - \text{FP}(f^*(X), Y)) + (\Psi^* d_2 - d_1)(\text{FN}_i(\hat{Y}, Y) - \text{FN}(f^*(X), Y))}{B_i(\hat{Y})} \\
&= \frac{1}{n} \sum_{i=1}^n \frac{(\Psi^* c_2 - c_1)(\text{FP}(\hat{Y}, Y) - \text{FP}(f^*(X), Y)) + (\Psi^* d_2 - d_1)(\text{FN}(\hat{Y}, Y) - \text{FN}(f^*(X), Y))}{B_i(\hat{Y})} \\
&\leq \frac{(\Psi^* c_2 - c_1)(\text{FP}(\hat{Y}, Y) - \text{FP}(f^*(X), Y)) + (\Psi^* d_2 - d_1)(\text{FN}(\hat{Y}, Y) - \text{FN}(f^*(X), Y))}{\gamma'} \\
&= C(\text{Risk}_\alpha(\hat{Y}, Y) - \text{Risk}_\alpha(f^*(X), Y)).
\end{aligned}$$

which is identical to the bound for family (3). It is easy to see that (5) also admits the above bound. Therefore, relation (10) holds for all definitions of  $\Psi$ , with the same  $\alpha$ .

### A.1.2 Proof of Lemma 3

Let  $Y, \hat{Y} \in \{0, 1\}^{n \times L}$ . Note that for any  $\ell$ ,  $\text{Risk}_\ell(f)$  is defined as:

$$\text{Risk}_\ell(f) = \mathbb{E}[\ell(\hat{Y}_{ij}, Y_{ij})] = \mathbb{E}_{X \sim \mathbb{P}_X^n} \mathbb{E}_{(i,j) \sim \pi} \mathbb{E}_{Y_{ij} \sim \mathbb{P}(\cdot | \mathbf{x}_i)} \ell(\hat{Y}_{ij}, Y_{ij}),$$

where  $\pi$  denotes the sampling distribution over  $(i, j)$  pairs. Fix instance  $i$  and label  $j$ . Let  $\eta_{ij}$  denote the conditional probability of label  $j$  of instance  $i$  being 1, i.e.  $\eta_{ij} = \mathbb{P}(Y_{ij} = 1 | \mathbf{x}_i)$ . For convenience,

denote  $\eta_{ij}$  simply by  $\eta$ . Given  $\eta \in [0, 1]$ , and  $\hat{y} \in \{0, 1\}$ , consider the conditional  $\ell_\alpha$ -risk of  $\hat{y}$ :

$$L_\alpha(\eta, \hat{y}) = \alpha(1 - \eta)[[\hat{y} = 1]] + (1 - \alpha)\eta[[\hat{y} = 0]],$$

and the corresponding conditional  $\ell_\alpha$  regret of  $\hat{y}$ :

$$\text{Reg}_\alpha^L(\eta, \hat{y}) = L_\alpha(\eta, \hat{y}) - \min_{\hat{y}} L_\alpha(\eta, \hat{y}),$$

where we have:  $\arg \min_{\hat{y}} L_\alpha(\eta, \hat{y}) = [[\eta - \alpha]]$ .

More generally, for a loss  $\ell$ , and a number  $\hat{z}$ , we have:

$$L_\ell(\eta, \hat{z}) = \ell(\hat{z}, 1)\eta + \ell(\hat{z}, 0)(1 - \eta),$$

and

$$\text{Reg}_\ell^L(\eta, \hat{z}) = L_\ell(\eta, \hat{z}) - \min_{\hat{z}} L_\ell(\eta, \hat{z}).$$

Now, observe that:

$$\text{Risk}_\alpha(\hat{\mathbf{Y}}, \mathbf{Y}) = \mathbb{E}_{\mathbf{X} \sim \mathbb{P}_X^n} \mathbb{E}_{(i,j) \sim \pi} L_\alpha(\eta_{ij}, \hat{\mathbf{Y}}_{ij}),$$

and

$$\text{Reg}_\alpha(\hat{\mathbf{Y}}, \mathbf{Y}) = \mathbb{E}_{\mathbf{X} \sim \mathbb{P}_X^n} \mathbb{E}_{(i,j) \sim \pi} \text{Reg}_\alpha^L(\eta_{ij}, \hat{\mathbf{Y}}_{ij}),$$

where the last equality follows from the fact that the Bayes optimal  $f_\alpha^*$  of the  $\ell_\alpha$ -risk minimizes the conditional  $L_\alpha(\eta_{ij}, \cdot)$  risk for each  $(i, j)$ . Let  $\mathbf{Z} = f(\mathbf{X}) \in \mathbb{R}^{n \times L}$  denote real-valued predictions obtained using some function  $f$ . Using the same arguments as by Kotłowski and Dembczyński [2015], we can show that, by setting threshold  $\theta^* = \xi(\alpha)$ , where  $\xi$  is the monotonic link function corresponding to  $\lambda'$ -strongly proper loss  $\ell$ , and  $\alpha$  is defined as in (9), the conditional  $\ell_\alpha$  regret of  $\hat{\mathbf{Y}}_{ij} = [[\mathbf{Z}_{ij} \geq \theta^*]]$  for a fixed  $(i, j)$  can be bounded as:

$$\text{Reg}_\alpha^L(\eta_{ij}, \hat{\mathbf{Y}}_{ij}) \leq \sqrt{\frac{2}{\lambda'}} \sqrt{\text{Reg}_\ell^L(\eta_{ij}, \mathbf{Z}_{ij})},$$

Taking expectation wrt sampling distribution  $\pi$  and the distribution over instances  $\mathbb{P}_X^n$  on both the sides of the above inequality, and applying Jensen's inequality, the statement of the Lemma follows.

### A.1.3 Proof of Lemma 4

The first part of the lemma is trivially true. For the second part, we can apply the same arguments as in Lemma 9 of Koyejo et al. [2014].

## A.2 Proof of Theorem 2

The following theorem bounds the error of the estimator  $\hat{\mathbf{W}} \in \mathbb{R}^{n \times L}$  in this model, via the result by Lafond [2015].

**Theorem 5** (Lafond [2015]). *Assume  $\pi$  is uniform, and consider the 1-bit matrix completion sampling model (2). Let  $\hat{\mathbf{W}}$  be the solution to the trace-norm regularized optimization problem (6) using logistic loss for  $\ell$  (with input  $\mathbf{X}$  assumed to be identity matrix of size  $n$ ), number of observations  $|\Omega| \geq \log(n + L) \min(n, L) \max(c'_\gamma \log^2(c''_\gamma \sqrt{\min(n, L)}), 1/9)$ , and setting the regularization parameter  $\lambda = 2c_\gamma \sqrt{\frac{2 \log(n+L)}{\min(n, L) |\Omega|}}$ . Then, with probability at least  $1 - 3(n + L)^{-1}$ , the following holds:*

$$\frac{\|\hat{\mathbf{W}} - \mathbf{W}^*\|_F^2}{nL} \leq \tilde{C} \max \left( \frac{\max(n, L) \text{rank}(\mathbf{W}^*) \log(n + L)}{|\Omega|} \left( \sigma_\gamma^2 + 1 \right), \gamma^2 \sqrt{\frac{\log(n + L)}{|\Omega|}} \right),$$

where  $\tilde{C}, c_\gamma, c'_\gamma, c''_\gamma, \sigma_\gamma$  are numerical constants and  $\gamma = \max_{ij} |\mathbf{W}_{ij}^*|$ .

The above theorem can be extended to general distributions  $\pi$  satisfying Assumption 2. See Lafond [2015] for more details. Now, we use the fact that  $\ell$  is 1-Lipschitz (say, by choosing logistic loss), and bound  $\mathbb{E}[\ell(\hat{\mathbf{W}}_{ij}, \mathbf{Y}_{ij}) - \ell(\mathbf{W}_{ij}^*, \mathbf{Y}_{ij})] \leq \frac{1}{nL} \sum_{ij} |\hat{\mathbf{W}}_{ij} - \mathbf{W}_{ij}^*|$ . Observing that  $\|\hat{\mathbf{W}} - \mathbf{W}^*\|_1 \leq \sqrt{nL} \|\hat{\mathbf{W}} - \mathbf{W}^*\|_F$ , and combining with the bound in Theorem 5, the proof is complete.

### A.3 Weakness of using Lafond [2015] for Multi-label Learning

In the multi-label learning model (1), one could hope to directly apply the analysis of Lafond [2015] for recovering  $\mathbf{XW}^* \in \mathbb{R}^{n \times L}$ , and in turn,  $\mathbf{W}^* \in \mathbb{R}^{d \times L}$ . In lieu of problem (6), we would then solve the optimization problem in Lafond [2015]:

$$\hat{\mathbf{W}} = \arg \min_{\mathbf{W}: \|\mathbf{XW}\|_\infty \leq \gamma} \frac{1}{|\Omega|} \sum_{(i,j) \in \Omega} \ell(\langle \mathbf{x}_i, \mathbf{w}_j \rangle, Y_{ij}) + \lambda \|\mathbf{XW}\|_* \quad (12)$$

Note that the only difference is how the trace-norm regularization is performed:  $\|\mathbf{XW}\|_*$  versus our proposed  $\|\mathbf{W}\|_*$  in Algorithm 1. The following corollary of Theorem 5 provides a bound for the recovery error of  $\hat{\mathbf{W}}$ .

**Corollary 2.** *Assume 1,  $\pi$  is uniform, and consider the sampling model (1). Let  $\hat{\mathbf{W}}$  be the solution to the trace-norm regularized optimization problem (12) using logistic loss for  $\ell$ , number of observations  $|\Omega| \geq \log(n+L) \min(n, L) \max(c'_\gamma \log^2(c''_\gamma \sqrt{\min(n, L)}), 1/9)$ , and setting the regularization parameter  $\lambda = 2c_\gamma \sqrt{\frac{2 \log(n+L)}{\min(n, L)|\Omega|}}$ . Then, with probability at least  $1 - 3(n+L)^{-1}$ , the following holds:*

$$\frac{\|\hat{\mathbf{W}} - \mathbf{W}^*\|_F^2}{dL} \leq \frac{\tilde{C}}{d} \max \left( \frac{\max(n, L) \text{rank}(\mathbf{W}^*) \log(n+L)}{|\Omega|} \left( \sigma_\gamma^2 + 1 \right), \gamma^2 \sqrt{\frac{\log(n+L)}{|\Omega|}} \right),$$

where  $\tilde{C}, c_\gamma, c'_\gamma, c''_\gamma, \sigma_\gamma$  are numerical constants and  $\gamma = \max_{ij} |(\mathbf{XW}^*)_{ij}|$ .

*Proof.* In the multilabel setting, Theorem 5 bounds  $\|\mathbf{XW} - \mathbf{XW}^*\|_F^2/nL$ , which in turn can be lowerbounded using Lemma 6 and then Lemma 7. Introducing  $(1/d)$  on both sides of the resulting inequality gives the average error stated in the corollary.  $\square$

When  $n \geq L$  and  $|\Omega| = O(n)$ , which is quite common in multi-label scenario, the above bound suggests that  $\hat{\mathbf{W}}$  from (12) is not even a consistent estimator, even when  $\pi$  is uniform.

### A.4 Proof of Theorem 3

The statement is a corollary of the more general Theorem 8, proved in Appendix B. We can compute the constants for the logistic loss as:  $\bar{\sigma}_\gamma \leq 1$  and  $\underline{\sigma}_\gamma \geq \frac{(1+e^\gamma)^2}{e^{-\gamma}}$ , over the domain  $[-\gamma, \gamma]$ .

### A.5 Proof of Theorem 4

The following result by [Hsieh et al., 2015] gives recovery bound for the resulting estimator  $\hat{\mathbf{W}}$ , as described in the text (Section 4.2.3).

**Theorem 6** ([Hsieh et al., 2015]). *With probability at least  $1 - 2(n+L)^{-1}$ ,*

$$\frac{\|\hat{\mathbf{W}} - \mathbf{W}^*\|_F^2}{nL} \leq 6 \frac{\sqrt{\log(n+L)}}{\sqrt{nL}(1-\rho)} + 2C \cdot t \frac{\sqrt{n} + \sqrt{L}}{(1-\rho)nL},$$

where  $C$  is absolute constant and  $\|\mathbf{W}^*\|_* \leq t$ . The proof is complete by using the same argument for 1-Lipschitz  $\ell$  as in the proof of Theorem 2.

## B Appendix B: Sampling from Exponential Distribution

We now consider the generalized matrix completion problem when the values are sampled iid from an exponential distribution parameterized by the input features  $\mathbf{x} \in \mathbb{R}^d$ . This setting extends that of Lafond [2015]. Let  $y_{ij} \in \mathbb{R}$  denote a random sample corresponding to the user  $i$  and label  $j$ , which is distributed as:

$$y_{ij} | \mathbf{x}_i, \mathbf{w}_j \sim \exp_{h,G}(\mathbf{x}_i, \mathbf{w}_j) := h(y_{ij}) \exp(\langle \mathbf{x}_i, \mathbf{w}_j \rangle y_{ij} - G(\langle \mathbf{x}_i, \mathbf{w}_j \rangle)). \quad (13)$$

where  $\langle \mathbf{x}_i, \mathbf{w}_j \rangle$ ,  $i = 1, 2, \dots, n$  and  $j = 1, 2, \dots, L$  are the canonical parameters,  $h$  and  $G$  are the base measure and log-partition functions associated with this canonical representation.

Let  $\mathbf{W}^* \in \mathbb{R}^{d \times L}$  denote the ground-truth parameter matrix with  $\mathbf{w}_j$ 's as columns. Similarly, let  $\mathbf{Y} \in \mathbb{R}^{n \times L}$  (with entries  $y_{ij}$ ) denote a random sample from  $\mathbf{X}\mathbf{W}^*$ . As in the standard matrix completion setting, we only observe values of  $\mathbf{Y}$  corresponding to a set of indices  $\Omega$  sampled iid from a fixed distribution  $\pi$ .

**Notation.** With a slight abuse, we will continue to use  $\langle \cdot, \cdot \rangle$  when the arguments are matrices, instead of the **trace** operator, i.e. for matrices  $A$  and  $B$  of appropriate dimensions,  $\langle A, B \rangle := \text{trace}(A^T B)$ . Let  $\|A\|_\infty = \max_{ij} |A_{ij}|$ ,  $\|A\|_F = \sqrt{\sum_{ij} A_{ij}^2}$ ,  $\|A\|_*$  denote the trace norm (sum of singular values of  $A$ ),  $\sigma_{\max}(A) = \|A\|_2$  denote the operator norm (maximum singular value) of  $A$ , and  $\sigma_{\min}(A)$  denote its smallest singular value.

### Maximum Log-likelihood Estimator.

We consider the negative log-likelihood of the observations, given by:

$$\Phi_Y(\mathbf{X}, \mathbf{W}) = -\frac{1}{|\Omega|} \sum_{(i,j) \in |\Omega|} y_{ij} \langle \mathbf{x}_i, \mathbf{w}_j \rangle - G(\langle \mathbf{x}_i, \mathbf{w}_j \rangle).$$

Constrained ML estimator is obtained as:

$$\hat{\mathbf{W}} := \arg \min_{\mathbf{W}: \|\mathbf{X}\mathbf{W}\|_\infty \leq \gamma} \Phi_Y^\lambda(\mathbf{X}, \mathbf{W}) := \Phi_Y(\mathbf{X}, \mathbf{W}) + \lambda \|\mathbf{W}\|_* \quad (14)$$

**Assumption 3.** 1. The function  $G(x)$  is twice differentiable and strongly convex on  $[-\gamma, \gamma]$ , such that there exists constants  $\bar{\sigma}_\gamma > 0$  and  $\underline{\sigma}_\gamma > 0$  satisfying:

$$\underline{\sigma}_\gamma^2 \leq G''(x) \leq \bar{\sigma}_\gamma^2,$$

for any  $x \in [-\gamma, \gamma]$ .

2. There exists a constant  $\delta_\gamma > 0$  such that for all  $x \in [-\gamma, \gamma]$  and  $y \sim \exp_{h,G}(x)$ :

$$\mathbb{E}_{y \sim \mathbb{P}(\cdot|x)} \left[ \exp \left( \frac{|y - G'(x)|}{\delta_\gamma} \right) \right] \leq e.$$

**Definition 1.** Given convex function  $G(x)$  define the Bregman divergence between two scalars  $x, x' \in \mathbb{R}$  as:

$$d_G(x, x') = G(x) - G(x') - G'(x')(x - x'). \quad (15)$$

**Remark 8.** Under Assumption 3.1, for any  $x, x' \in [-\gamma, \gamma]$ , the Bregman divergence  $G$  satisfies:

$$\underline{\sigma}_\gamma^2 (x - x')^2 \leq 2d_G(x, x') \leq \bar{\sigma}_\gamma^2 (x - x')^2. \quad (16)$$

Let  $E_{ij} \in \mathbb{R}^{n \times L}$  denote the indicator matrix with zeros everywhere except at  $(i, j)$  where it is 1. For  $(\epsilon_{ij})_{i,j=1}^{|\Omega|}$  a Rademacher sequence independent from  $(\Omega, Y_\Omega)$ , define:

$$\Sigma_R := \frac{1}{|\Omega|} \sum_{(i,j) \in \Omega} \epsilon_{ij} E_{ij}. \quad (17)$$

**Theorem 7.** Assume 3.1, 2.1,  $\|XW^*\|_\infty \leq \gamma$ ,  $\sigma_{\min}(X) > 0$  and  $2\|X^T \nabla \Phi_Y(X, W^*)\|_2 \leq \lambda$ . Then, with probability at least  $1 - 2(n+L)^{-1}$ , the following holds:

$$\frac{\|\hat{W} - W^*\|_F^2}{dL} \leq \frac{C\mu^2 n}{\sigma_{\min}^2(X) \cdot d} \max \left( L \text{rank}(W^*) \left( \frac{\lambda^2}{\sigma_\gamma^4} \frac{n}{\sigma_{\min}^2(X)} + d(\mathbb{E}\|\Sigma_R\|_2)^2 \right), \frac{\gamma^2}{\mu} \sqrt{\frac{\log(n+L)}{|\Omega|}} \right),$$

where  $C$  is a numerical constant and  $\Sigma_R$  is defined as in (17).

*Proof.* The proof closely follows that of Theorem 5 of Lafond [2015]. As  $\hat{W}$  is the minimizer of (14), we have:

$$\Phi_Y^\lambda(X, \hat{W}) - \Phi_Y^\lambda(X, W^*) \leq 0$$

It follows that:

$$\lambda(\|\hat{W}\|_* - \|W^*\|_*) + \frac{1}{|\Omega|} \sum_{(i,j) \in \Omega} y_{ij} \langle \mathbf{x}_i, \mathbf{w}_j^* - \hat{\mathbf{w}}_j \rangle + G(\langle \mathbf{x}_i, \hat{\mathbf{w}}_j \rangle) - G(\langle \mathbf{x}_i, \mathbf{w}_j^* \rangle) \leq 0$$

Using the fact that the gradient matrix:

$$\nabla \Phi_Y(X, W^*) := \nabla_{XW^*} \Phi_Y(X, W^*) = -\frac{1}{|\Omega|} \sum_{(i,j) \in \Omega} (y_{ij} - G'(\langle \mathbf{x}_i, \mathbf{w}_j^* \rangle)) E_{ij} \quad (18)$$

(where  $E_{ij}$  are the indicator matrices defined earlier) in the above inequality, we have:

$$\lambda(\|\hat{W}\|_* - \|W^*\|_*) + \left\langle \nabla \Phi_Y(X, W^*), X(W^* - \hat{W}) \right\rangle + \frac{1}{|\Omega|} \sum_{(i,j) \in \Omega} G(\langle \mathbf{x}_i, \hat{\mathbf{w}}_j \rangle) - G(\langle \mathbf{x}_i, \mathbf{w}_j^* \rangle) - G'(\langle \mathbf{x}_i, \mathbf{w}_j^* \rangle)(\langle \mathbf{x}_i, \hat{\mathbf{w}}_j - \mathbf{w}_j^* \rangle) \leq 0.$$

Using the definition of the divergence (15), and the fact that  $\left\langle \nabla \Phi_Y(X, W^*), X(W^* - \hat{W}) \right\rangle = \left\langle X^T \nabla \Phi_Y(X, W^*), W^* - \hat{W} \right\rangle$  it follows that:

$$D_G^\Omega(X\hat{W}, XW^*) := \frac{1}{|\Omega|} \sum_{(i,j) \in \Omega} d_G(\langle \mathbf{x}_i, \hat{\mathbf{w}}_j \rangle, \langle \mathbf{x}_i, \mathbf{w}_j^* \rangle) \leq \lambda(\|W^*\|_* - \|\hat{W}\|_*) - \left\langle X^T \nabla \Phi_Y(X, W^*), W^* - \hat{W} \right\rangle$$

The first term in the RHS of above inequality can be bounded first using Lemma 16-(iii) of Lafond [2015]. The second term can be bounded using the trace inequality (that uses the duality between  $\|\cdot\|_*$  and  $\|\cdot\|_2$ ) and the assumption on  $\lambda$  stated in the Theorem. We get:

$$D_G^\Omega(X\hat{W}, XW^*) \leq \lambda(\|\mathcal{P}_{W^*}(\hat{W} - W^*)\|_* + \frac{1}{2}\|\hat{W} - W^*\|_*).$$

To bound the first term in the above equation, we can apply Lemma 16-(ii) of Lafond [2015]. Lemma 5 gives a bound for the second term. Together we have:

$$D_G^\Omega(X\hat{W}, XW^*) \leq 3\lambda\sqrt{2 \text{rank}(W^*)}\|\hat{W} - W^*\|_F. \quad (19)$$

By strong convexity of  $G$  (Assumption 3.1), we have:

$$\Delta_Y^2(X\hat{W}, XW^*) := \frac{1}{|\Omega|} \sum_{(i,j) \in \Omega} (\langle \mathbf{x}_i, \hat{\mathbf{w}}_j - \mathbf{w}_j^* \rangle)^2 \leq \frac{2}{\sigma_\gamma^2} D_G^\Omega(X\hat{W}, XW^*). \quad (20)$$

Now, we will get a lower bound for  $\Delta_Y^2(X\hat{W}, XW^*)$ . To do so, let us define  $\beta := 8e\gamma^2\sqrt{\log(n+L)/|\Omega|}$  and distinguish the two following cases:

**Case 1** If  $\mathbb{E}[(\langle \mathbf{x}_i, \hat{\mathbf{w}}_j - \mathbf{w}_j^* \rangle)^2] \leq \beta$ , where  $\mathbb{E}$  is defined wrt the sampling distribution as in Assumption 2, then Lemma 18 of Lafond [2015] yields,

$$\frac{\|X\hat{W} - XW^*\|_F^2}{nL} \leq \mu\beta. \quad (21)$$

**Case 2** If  $\mathbb{E}[(\langle \mathbf{x}_i, \hat{\mathbf{w}}_j - \mathbf{w}_j^* \rangle)^2] > \beta$ , consider  $\hat{\mathbf{W}} \in \mathcal{C}(\beta, 32\mu dL \text{rank}(\mathbf{W}^*))$ , where  $\mathcal{C}(\cdot, \cdot)$  is defined as:

$$\mathcal{C}(\beta, r) = \left\{ \mathbf{W} \in \mathbb{R}^{d \times L} \mid \|\mathbf{W}^* - \hat{\mathbf{W}}\|_* \leq \sqrt{r \mathbb{E}[\Delta_Y^2(\mathbf{X}\mathbf{W}, \mathbf{X}\mathbf{W}^*)]}; \mathbb{E}[\Delta_Y^2(\mathbf{X}\mathbf{W}, \mathbf{X}\mathbf{W}^*)] > \beta \right\}. \quad (22)$$

Then, from Lemma 19 of Lafond [2015], it holds with probability at least  $1 - 2(n + L)^{-1}$  that

$$\Delta_Y^2(\mathbf{X}\hat{\mathbf{W}}, \mathbf{X}\mathbf{W}^*) \geq \frac{1}{2} \mathbb{E}[\Delta_Y^2(\mathbf{X}\hat{\mathbf{W}}, \mathbf{X}\mathbf{W}^*)] - 512e(\mathbb{E}[\|\Sigma_R\|_2]^2 \mu dL \text{rank}(\mathbf{W}^*)). \quad (23)$$

Combining the above inequality with (20), (19) and Lemma 18 of Lafond [2015] yields:

$$\frac{\|\mathbf{X}\hat{\mathbf{W}} - \mathbf{X}\mathbf{W}^*\|_F^2}{2\mu nL} - 512e(\mathbb{E}[\|\Sigma_R\|_2]^2 \mu dL \text{rank}(\mathbf{W}^*)) \leq \frac{6\lambda}{\underline{\sigma}_\gamma^2} \sqrt{2 \text{rank}(\mathbf{W}^*)} \|\hat{\mathbf{W}} - \mathbf{W}^*\|_F.$$

We can use Lemma (6) to bound the first term from below. Applying the identity  $ab \leq (a^2 + b^2)/4$ , multiplying both sides of the inequality by  $1/d$ , rearranging and combining with (21), the proof is complete.  $\square$

**Theorem 8.** Assume 1, 2, 3. Choose,  $n \geq C' \cdot d$ ,  $L \geq d$ ,  $|\Omega| \geq L + d$  and  $\lambda = \frac{2c\bar{\sigma}_\gamma}{\sqrt{|\Omega|}}$ . Then, with probability at least  $1 - 3(n + L)^{-1} - 2(d + L)^{-1}$ , the following holds:

$$\frac{\|\hat{\mathbf{W}} - \mathbf{W}^*\|_F^2}{dL} \leq \frac{C_2\mu^2}{d} \max \left( \frac{L \text{rank}(\mathbf{W}^*) \log(n + L)}{|\Omega|} \left( \frac{\bar{\sigma}_\gamma^2}{\underline{\sigma}_\gamma^4} + 1 \right), \frac{\gamma^2}{\mu} \sqrt{\frac{\log(n + L)}{|\Omega|}} \right),$$

where  $c, C', C_2$  are numerical constants.

*Proof.* It suffices to show  $2\|\mathbf{X}^T \nabla \Phi(\mathbf{X}, \mathbf{W}^*)\|_2 \leq \lambda$  for chosen  $\lambda$  in the statement of the Theorem and a suitable bound for  $\mathbb{E}\|\Sigma_R\|_2$  (the result would then follow by applying Theorem 7). The latter term can be readily bounded applying the corresponding arguments in the proof of Theorem 6 of Lafond [2015], which yields:

$$\mathbb{E}\|\Sigma_R\|_2 \leq c^* \sqrt{\frac{2e \log(n + L)}{|\Omega|} \left( \frac{\nu}{\min(n, L)} \right)}, \quad (24)$$

where we use the fact that  $\sum_{l=1}^L \pi_{k,l} = \frac{\nu}{\min(n, L)}$  (by Assumption 2). where  $c^*$  is a numerical constant.

We can apply Lemma 1 to bound  $\|\mathbf{X}^T \nabla \Phi(\mathbf{X}, \mathbf{W}^*)\|_2$ , with the  $\lambda$  chosen in the statement of the Theorem. The proof is complete noting that for the choice of  $n$  as in the statement of the Theorem, Lemma 7 implies  $\sigma_{\min}^2(\mathbf{X}) \geq \underline{C}n$  and that for the choice of  $n$  and  $L$  as in the statement of the Theorem,  $\frac{d}{\min(n, L)} \leq 1$ .  $\square$

**Lemma 5.** Let  $\mathbf{X}\mathbf{W}, \mathbf{X}\tilde{\mathbf{W}} \in \mathbb{R}^{n \times L}$  satisfy  $\|\mathbf{X}\mathbf{W}\|_\infty \leq \gamma$  and  $\|\mathbf{X}\tilde{\mathbf{W}}\|_\infty \leq \gamma$ . Assume  $2\|\mathbf{X}^T \nabla \Phi_Y(\mathbf{X}, \tilde{\mathbf{W}})\|_2 \leq \lambda$ , and  $\Phi_Y^\lambda(\mathbf{X}, \mathbf{W}) \leq \Phi_Y^\lambda(\mathbf{X}, \tilde{\mathbf{W}})$ . Then:

- (i)  $\|\mathcal{P}_{\tilde{\mathbf{W}}}^\perp(\mathbf{W} - \tilde{\mathbf{W}})\|_* \leq 3\|\mathcal{P}_{\tilde{\mathbf{W}}}(\mathbf{W} - \tilde{\mathbf{W}})\|_*$ ,
- (ii)  $\|\mathbf{W} - \tilde{\mathbf{W}}\|_* \leq 4\sqrt{2 \text{rank}(\tilde{\mathbf{W}})} \|\mathbf{W} - \tilde{\mathbf{W}}\|_F$ .

*Proof.* The proof closely follows that of Lemma 17 of [Lafond, 2015]. By definition, we have:

$$\Phi_Y^\lambda(\mathbf{X}, \mathbf{W}) - \Phi_Y^\lambda(\mathbf{X}, \tilde{\mathbf{W}}) \leq 0$$

or,

$$\Phi_Y(\mathbf{X}, \mathbf{W}) - \Phi_Y(\mathbf{X}, \tilde{\mathbf{W}}) \leq \lambda(\|\tilde{\mathbf{W}} - \mathbf{W}\|_*).$$

Writing  $\mathbf{W} \in \mathbb{R}^{d \times L}$  as  $\mathbf{W} = \tilde{\mathbf{W}} + \mathcal{P}_{\tilde{\mathbf{W}}}^\perp(\mathbf{W} - \tilde{\mathbf{W}}) + \mathcal{P}_{\tilde{\mathbf{W}}}(\mathbf{W} - \tilde{\mathbf{W}})$ , Lemma 16-(i) of [Lafond, 2015] and triangle inequality together give:

$$\|\mathbf{W}\|_* \geq \|\tilde{\mathbf{W}}\|_* + \|\mathcal{P}_{\tilde{\mathbf{W}}}^\perp(\mathbf{W} - \tilde{\mathbf{W}})\|_* + \|\mathcal{P}_{\tilde{\mathbf{W}}}(\mathbf{W} - \tilde{\mathbf{W}})\|_*,$$

Or,

$$\Phi_Y(\mathbf{X}, \tilde{\mathbf{W}}) - \Phi_Y(\mathbf{X}, \mathbf{W}) \geq \lambda(\|\mathcal{P}_{\tilde{\mathbf{W}}}^\perp(\mathbf{W} - \tilde{\mathbf{W}})\|_* + \|\mathcal{P}_{\tilde{\mathbf{W}}}(\mathbf{W} - \tilde{\mathbf{W}})\|_*) . \quad (25)$$

Note that by convexity of  $\Phi_Y$ :

$$\Phi_Y(\mathbf{X}, \tilde{\mathbf{W}}) - \Phi_Y(\mathbf{X}, \mathbf{W}) \leq \left\langle \nabla \Phi_Y(\mathbf{X}, \tilde{\mathbf{W}}), \mathbf{X}\tilde{\mathbf{W}} - \mathbf{X}\mathbf{W} \right\rangle = \left\langle \mathbf{X}^T \nabla \Phi_Y(\mathbf{X}, \tilde{\mathbf{W}}), \tilde{\mathbf{W}} - \mathbf{W} \right\rangle,$$

By trace inequality, we have:

$$\Phi_Y(\mathbf{X}, \tilde{\mathbf{W}}) - \Phi_Y(\mathbf{X}, \mathbf{W}) \leq \|\mathbf{X}^T \nabla \Phi_Y(\mathbf{X}, \tilde{\mathbf{W}})\|_2 \|\tilde{\mathbf{W}} - \mathbf{W}\|_* \leq \frac{\lambda}{2} \|\tilde{\mathbf{W}} - \mathbf{W}\|_*$$

where the last inequality is by assumption,  $\|\mathbf{X}^T \nabla \Phi_Y(\mathbf{X}, \tilde{\mathbf{W}})\|_2 \leq \lambda/2$ . The last term in the above inequality can be bounded by  $\frac{\lambda}{2} \left( \|\mathcal{P}_{\tilde{\mathbf{W}}}^\perp(\mathbf{W} - \tilde{\mathbf{W}})\|_* + \|\mathcal{P}_{\tilde{\mathbf{W}}}(\mathbf{W} - \tilde{\mathbf{W}})\|_* \right)$ . Together with (25), we get the first part of the Lemma. We can now conclude the proof of part two using identical arguments as in Lemma 17 of [Lafond, 2015].  $\square$

**Lemma 6.** Let  $\sigma_{\min}(\mathbf{X})$  denote the smallest singular value of  $\mathbf{X}$ . Then for any  $\mathbf{W}, \tilde{\mathbf{W}}$ , Then:

$$\|\mathbf{X}\mathbf{W} - \mathbf{X}\tilde{\mathbf{W}}\|_F^2 \geq \sigma_{\min}^2(\mathbf{X}) \|\mathbf{W} - \tilde{\mathbf{W}}\|_F^2.$$

*Proof.* Observe that  $\|\mathbf{X}(\mathbf{W} - \tilde{\mathbf{W}})\|_F^2 = \text{trace}(\mathbf{X}(\mathbf{W} - \tilde{\mathbf{W}})(\mathbf{W} - \tilde{\mathbf{W}})^T \mathbf{X}^T) = \text{trace}((\mathbf{W} - \tilde{\mathbf{W}})(\mathbf{W} - \tilde{\mathbf{W}})^T \mathbf{X}^T \mathbf{X}) \geq \sigma_{\min}(\mathbf{X}^T \mathbf{X}) \text{trace}((\mathbf{W} - \tilde{\mathbf{W}})(\mathbf{W} - \tilde{\mathbf{W}})^T) = \sigma_{\min}(\mathbf{X})^2 \|\mathbf{W} - \tilde{\mathbf{W}}\|_F^2$ .  $\square$

**Lemma 7.** Let  $\mathbf{X} \in \mathbb{R}^{n \times d}$  be a matrix with rows sampled from sub-Gaussian distribution satisfying Assumption 1. Furthermore, choose:

$$n \geq C' d .$$

Then, with probability at least  $1 - 2e^{-d}$ , each of the following statements is true:

$$\sigma_{\max}(\mathbf{X}^T \mathbf{X}) \leq \bar{C} n,$$

$$\sigma_{\min}(\mathbf{X}^T \mathbf{X}) \geq \underline{C} n,$$

where  $C', \bar{C}$  and  $\underline{C}$  are absolute constants that depend only on the parameters  $K$  and  $\Sigma$  of the sub-Gaussian distribution.

*Proof.* Using Lemma 16 of Bhatia et al. [2015b], we have for any  $\delta > 0$ , with probability at least  $1 - \delta$ , each of the following statements hold:

$$\sigma_{\max}(\mathbf{X}^T \mathbf{X}) \leq \sigma_{\max}(\Sigma) \cdot n + C_K \sqrt{dn} + t\sqrt{n},$$

$$\sigma_{\min}(\mathbf{X}^T \mathbf{X}) \geq \sigma_{\min}(\Sigma) \cdot n - C_K \sqrt{dn} - t\sqrt{n},$$

where  $t = \sqrt{\frac{1}{c_K} \log \frac{2}{\delta}}$ , and  $c_K, C_K$  are absolute constants that depend only on the sub-Gaussian norm  $K$  of the distribution  $\mathbb{P}_{\mathcal{X}}$ . Now, choosing  $\delta = 2e^{-d}$  or  $\log(2/\delta) = d$ , we have:

$$C_K \sqrt{dn} + t\sqrt{n} = C_K \sqrt{dn} + \sqrt{\frac{1}{c_K} dn} = \sqrt{dn} \left( C_K + \sqrt{\frac{1}{c_K}} \right).$$

For ease, define  $C'_K := C_K + \sqrt{\frac{1}{c_K}}$ . Now, choosing  $n \geq \left( \frac{C'_K}{\sigma_{\min}(\Sigma)} \right)^2 \cdot d$ , and substituting above we have:

$$C_K \sqrt{dn} + t\sqrt{n} \leq \frac{1}{2} \sigma_{\min}(\Sigma) \cdot n.$$

Therefore:

$$\sigma_{\max}(\mathbf{X}^T \mathbf{X}) \leq \left( \sigma_{\max}(\Sigma) + \frac{1}{2} \sigma_{\min}(\Sigma) \right) n,$$

$$\sigma_{\min}(\mathbf{X}^T \mathbf{X}) \geq \frac{1}{2} \sigma_{\min}(\Sigma) \cdot n.$$

The proof is complete.  $\square$



### Proof of Lemma 1

Let  $H$  denote the matrix with  $h_{ij} = y_{ij} - G'(\langle \mathbf{x}_i, \mathbf{w}_j^* \rangle)$ . Let  $\mathbf{h}^i$  denote the  $i$ th row of  $H$ . Let  $\mathcal{P}_\Omega(H)$  denote the projection of  $H$  onto the observed indices  $\Omega$ . Let  $\Omega_i$  denote the observed indices in row  $i$  of  $\mathbf{Y}$ . For a vector  $\mathbf{v}$ , let  $\mathbf{v}_{\Omega_i}$  denote its projection onto the observed indices  $\Omega_i$ .

Fix  $\mathbf{u} \in \mathbb{R}^d$  and  $\mathbf{v} \in \mathbb{R}^L$ . Define  $a_i = \mathbf{x}_i^T \mathbf{u}$  and  $b_i = \langle \mathbf{v}_{\Omega_i}, \mathbf{h}_{\Omega_i}^i \rangle$ . We have:

$$\begin{aligned} \frac{1}{|\Omega|} \mathbf{u}^T \mathbf{X}^T \mathcal{P}_\Omega(H) \mathbf{v} &= \frac{1}{|\Omega|} \sum_{i=1}^n a_i b_i \\ &= \frac{1}{|\Omega|} \sum_{i=1}^n \|\mathbf{v}_{\Omega_i}\|_2 \cdot a_i \frac{b_i}{\|\mathbf{v}_{\Omega_i}\|_2}. \end{aligned}$$

Consider  $b_i = \sum_{(i,j) \in \Omega} v_j h_{ij}$ . Note that  $h_{ij}$ 's are sub-Gaussian random variables with sub-Gaussian norm  $\alpha$ . Using Lemma 5.9 of Vershynin [2010], we have  $b_i$  is sub-Gaussian with norm  $\|\mathbf{v}_{\Omega_i}\|_2 \alpha$ . In turn, this implies,  $\frac{b_i}{\|\mathbf{v}_{\Omega_i}\|_2}$  is sub-Gaussian with sub-Gaussian norm  $\alpha$ . Therefore,  $\frac{a_i b_i}{\|\mathbf{v}_{\Omega_i}\|_2}$  is  $\alpha$ -subexponential. Applying Proposition 5.16 of Vershynin [2010], we have, with probability at least  $1 - \delta$ ,

$$\frac{1}{|\Omega|} \sum_{i=1}^n \|\mathbf{v}_{\Omega_i}\|_2 \cdot a_i \frac{b_i}{\|\mathbf{v}_{\Omega_i}\|_2} \leq \frac{c \cdot \alpha}{|\Omega|} \left( \sqrt{\sum_{i=1}^n \|\mathbf{v}_{\Omega_i}\|^2} \sqrt{\log \frac{2}{\delta}} + \max_{i \in [n]} \|\mathbf{v}_{\Omega_i}\|^2 \log \frac{2}{\delta} \right).$$

for some absolute constant  $c$ . Noting that:  $\|\mathbf{v}\|_2 = 1$  and for any  $j \in [L]$ ,  $|\{i : (i, j) \in \Omega\}| \leq \frac{c' \cdot |\Omega|}{L}$  for some constant  $c'$ , we have, with probability at least  $1 - \delta$ ,

$$\frac{1}{|\Omega|} \sum_{i=1}^n \|\mathbf{v}_{\Omega_i}\|_2 \cdot a_i \frac{b_i}{\|\mathbf{v}_{\Omega_i}\|_2} \leq \frac{c \cdot \alpha}{|\Omega|} \left( \sqrt{\frac{c' \cdot |\Omega|}{L}} \sqrt{\log \frac{2}{\delta}} + \log \frac{2}{\delta} \right).$$

We conclude the proof by a covering argument: Taking a union bound over  $\epsilon$ -ball of  $\mathbf{u}$  and  $\mathbf{v}$ , we have, with probability at least  $1 - (d + L)^{-1}$ :

$$\|\mathbf{X}^T \nabla \Phi_Y(\mathbf{X}, \mathbf{w}^*)\|_2 \leq \frac{c \cdot \alpha}{|\Omega|} \left( \sqrt{\frac{c' \cdot |\Omega|}{L}} \sqrt{d + L} + d + L \right).$$

Assuming  $d \leq L$  and  $|\Omega| \geq (L + d)$ , the proof is complete.
